# Supplementary figures and images for: The Bank Vole (Clethrionomys glareolus)—Small Animal Model for Hepacivirus Infection
Source: MDPI journal article supplement (doi:10.3390/v13122421), 2021-12-03

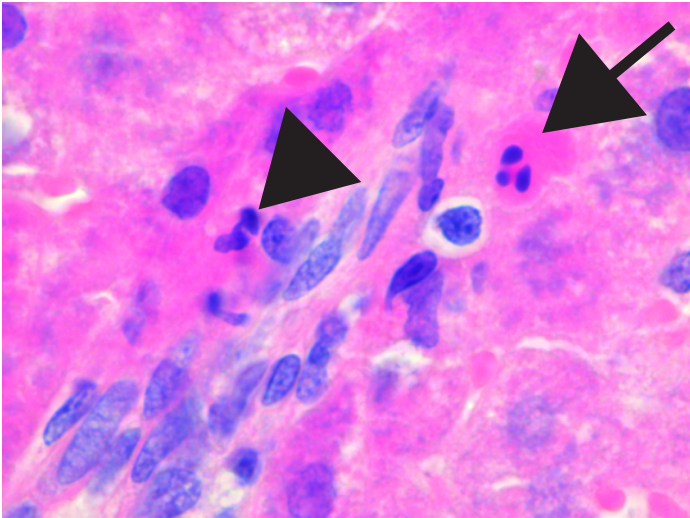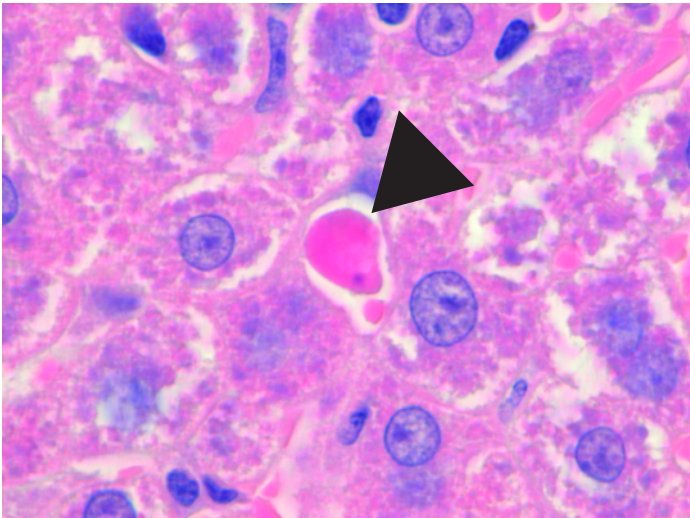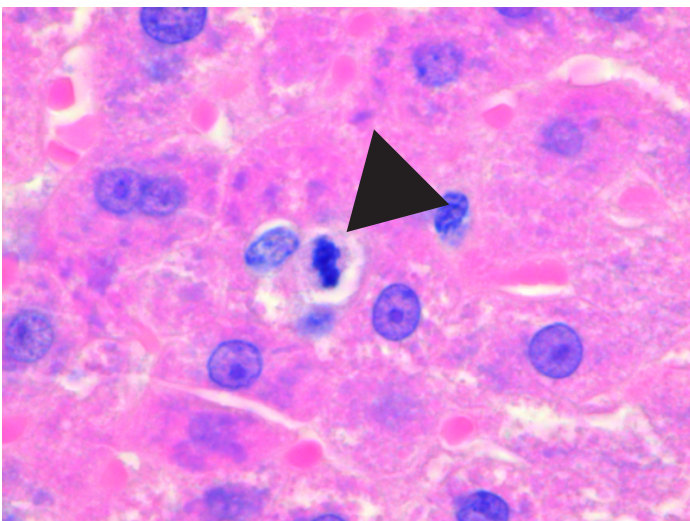

Supplement: s1 [file s1]
